# Enhanced recovery of CD9-positive extracellular vesicles from human specimens by chelating reagent

Ayako Kurimoto, Yuki Kawasaki, Toshiki Ueda, Tatsutoshi Inuzuka  
Research Department, Miraca Research Institute G.K., Tokyo, Japan

Corresponding author  
E-mail: tatsutoshi.inuzuka@miraca.com (TI)

## Abstract

Extracellular vesicles (EVs) have gained attention as potential targets of early diagnostics and prognosis in the field of liquid biopsy. Despite clinical potentials, the best method to isolate EVs from specimens remains controversial due to low purity, low specificity, and lack of reproducibility with current isolation methods. Here we show that a chelating reagent enhances the recovery efficiency of EVs from crude biological samples by immunoprecipitation using an anti-CD9 antibody. Proteomic and western blotting analyses show that the EVs isolated using the chelating reagent contain a wider variety of proteins than those isolated with PBS.

## Introduction

EVs are secreted from all types of cells and found in most body fluids, including blood, urine, and saliva(1–3). Several functions of EVs have been reported e.g., intercellular interaction and cancer metastasis; however, the exact biological role of EVs is unclear.

In addition, EVs contain several biologically active molecules such as proteins, mRNA, miRNA, long non-coding RNA (lncRNA), DNA, and phospholipids, which reflect states of cells or organs (4,5). Such biomolecules found in EVs are expected to serve as diagnostic biomarkers or prognostic markers for various diseases in clinical fields.

Despite the high clinical need, EV-based liquid biopsy has not been widely used yet due to a lack of standardized isolation methods from specimens. The most commonly used techniques for EV isolation are ultracentrifugation (UC) and polymer-based precipitation. UC and polymer-based precipitation methods, however, cause aggregation of EVs (6). Furthermore, these techniques are compromised by low selectivity: EVs include microvesicles, apoptotic bodies, and exosomes (7), and such heterogeneity leads to the lack of reproducibility and reliability, hampering clinical utilization. Recent studies suggested that the surface of EVs is positively charged, and it attracts negatively charged molecules such as DNA- and RNA-binding proteins are found on surface of EVs (8).

Rapid and selective isolation of EVs is possible by immunoprecipitation (IP) methods using antibodies against surface marker proteins of interest. Hence, we employed IP method based on surface marker proteins for rapid and specific isolation of EVs. Though, the recovery rate of EVs by IP method is not enough for clinical use, here we report that IP method with a chelating reagent improves yields and purity of EVs from multiple human specimens. The isolated EVs could be used for quantitative and qualitative proteomic analyses with LC-MS/MS. We report that IP method with a chelating reagent improves yields and purity of EVs from multiple human specimens.

## Materials and Methods

## Materials

NIH-H1299 cell lines were obtained from ATCC. Minimum Essential Medium (MEM) Non-essential Amino Acids Solution and Penicillin-Streptomycin solution (x100) were purchased from FUJIFILM Wako Pure Chemical Corporation. Fetal Bovine Serum (FBS) was purchased from Gibco, Thermo Fisher Scientific Inc. Ethylenediaminetetraacetic acid (EDTA) and glycoetherdiamine-N,N,N',N'-tetraacetic acid (EGTA) were purchased from Dojindo Molecular Technologies, Inc. 1,4-Dithiothreitol (DTT) was purchased from FUJIFILM Wako Pure Chemical Corporation. Anti-CD81 antibody (SHI-EXO-MO3), and pooled human serum were purchased from Cosmo Bio Co., Ltd. A matched set of specimens was purchased from ProMedDx, LLC. MagCapture Exosome Isolation Kit PS was purchased from FUJIFILM Wako Pure Chemical Corporation. Total Exosome Isolation Reagent (from serum) was purchased from Thermo Fisher Scientific Inc. The following antibodies were used for immunostaining: Goat anti-human albumin antibody HRP Conjugated (A80-129P, Bethyl Laboratories, Inc.), goat anti-human IgG H&L (HRP) (ab6858, Abcam plc), anti-apolipoprotein E antibody (Biotin) (ab24274, Abcam plc). Volunteers for saliva and urine samples were recruited from Miraca Research Institute G.K., and the study was conducted with the approval (18-30) by the institutional review board of Miraca Holdings, Inc. Urine and saliva samples were diluted 3-fold with PBS or EDEG.

## Preparation of serum EVs by UC

Serum (1 mL) was centrifuged at 15,000 x g for 15min at 4°C, and the supernatant was ultracentrifuged at 100,000 x g for 1 h at 4°C by himac (Koki Holdings Co., Ltd.) with S55A2 rotor (k-factor: 162). The pellet was resuspended in 1 mL of PBS or EDEG (50 mM EDTA and 50 mM EGTA in PBS), followed by ultracentrifugation at 100,000 x g for 1 h at 4°C to eliminate other contaminating molecules. Resulting EVs were resuspended in PBS and stored at 4°C until use.

## EV isolation from culture media by UC

NIH-H1299 cells were grown in 10% FBS, MEM Non-essential Amino Acids Solution (x100), and Penicillin-Streptomycin solution (x100). Subconfluent cells were washed with PBS twice and grown for 72 h in FBS-free medium before EV isolation. The cell culture supernatants were collected and filtered through 0.22 µm pore membranes using the vacuum filter/storage bottle system (Corning Incorporated) to remove large contaminating vesicles. The obtained conditioned medium was centrifuged at 2,000 x g for 5 min at 4°C, followed by concentration using Amicon Ultra-15 Centrifugal Filter Unit (100 kDa cutoff, Merck KGaA). The concentrated medium (6 mL) was centrifuged at 15,000 x g for 15min at 4°C, and the supernatant was followed by ultracentrifugation at 100,000 x g for 1 h at 4°C by himac (Koki Holdings Co., Ltd.) with an S55A2 rotor (k-factor: 161.6). The pellet was resuspended in 100 µL of PBS or EDEG (50 mM EDTA and 50 mM EGTA in PBS), followed by ultracentrifugation at 100,000 x g for 1 h at 4°C. The resulting pellet that contains EVs was resuspended in PBS and stored at 4°C until use. The protein concentration of the purified EVs was determined by Qubit protein assay kit (Thermo Fisher Scientific Inc.).

## Polymer-based precipitation

Total Exosome Isolation Reagent (from serum) was used according to the manufacturer's instruction. Frozen pooled serum was thawed at room temperature and centrifuged for 30 min at 2000 x g at 4°C. The supernatant (1 mL) was mixed with 60 µL of Total Exosome Isolation Reagent (from serum). The sample was incubated at 4°C for 30 min. The mixture was centrifuged at 10,000 x g at 4°C and the obtained pellet was resuspended in PBS. The pellet containing EVs was stored at 4°C until use.

### **Preparation of antibodies against CD9 and CD63**

Antibodies against CD9 and CD63 were prepared as described previously (9) with the modification that 50 µg of EVs from NIH-H1299 obtained by ultracentrifugation method was used as a the source of antigen. Biotinylations of the anti-CD9 monoclonal antibody and anti-CD63 monoclonal antibody were performed using EZ-Link™ Sulfo-NHS-LC-Biotin (Thermo Fisher Scientific Inc.) according to the manufacturer's protocol.

### **IP of EVs**

Anti-CD9 antibody coupled with Dynabeads M-280 Tosylactivated (Thermo Fisher Scientific Inc.) was added to matched set specimens (serum and plasma), urine, and saliva that were diluted 1:3 with EDEG or PBS, followed by incubation on a rotator at 4°C for 18 h. The beads were washed three times with PBS and stored at 4°C until further analysis.

### **Western blotting analysis**

The antibodies were diluted with Can Get Signal (TOYOBO Co., LTD.) to 1 µg/mL. Immunocaptured EVs on Dynabeads M-280 Tosylactivated were lysed by 4x Laemmli Sample Buffer (Bio-Rad Laboratories, Inc.) under nonreducing condition (without DTT) for CD9, CD63, and CD81 or reducing condition (supplemented with 50 mM DTT) for other proteins followed by boiling for 5 min at 96°C. The obtained protein samples were separated by SDS-PAGE and then transferred to PVDF membranes (ATTO Corporation.). After blocking with Blocking One (NACALAI TESQUE, INC.), the membranes were incubated with primary antibodies followed by incubation with secondary antibodies for 1 h at room temperature. The membranes were washed with PBS with Tween® 20 (TAKARA BIO INC.) three times and incubated with secondary antibodies for 1 h at room temperature. After washing, ECL™ Select Western Blotting Detection Reagent (GE Healthcare, GENERAL ELECTRIC COMPANY) was added to the membrane. Protein was detected by using ImageQuant™ LAS 500 imager (GE Healthcare, GENERAL ELECTRIC COMPANY).

### **Preparation of peptide**

Pelleted EVs were lysed with 40 µL of 1% *Rapi*Gest™ SF (Waters Corporation) in 50 mM ammonium bicarbonate (Honeywell Fluka™, Thermo Fisher Scientific, Inc.) supplemented with 50 mM DTT, followed by incubation at 60°C for 30 min. After being allowed to cool down to room temperature, the lysed samples were added by 4 µL of 150 mM 2-iodoacetamide and incubated at room temperature for 30 min in the dark. The lysates were incubated with 1 µg/mL of Trypsin/Lys-C Mix, Mass Spec Grade (Promega Corporation) at 37°C overnight. To break down the detergent, 4 µL of 10% of trifluoroacetic acid (Thermo Fisher Scientific, Inc.) was added to the digested mixture and incubated at 37 °C for 30min. After centrifugation at 13,000 x g for 10 min, the supernatant was collected and lyophilized with miVac system (Genevac Ltd) and desalted with Pierce C-18 Spin Columns according to the manufacturer's instruction. Obtained peptides were eluted with 70% acetonitrile, followed by lyophilization, and stored at -80 °C until use.

### **Proteomic analysis with LC-MS**

Obtained peptides were reconstituted by 20ul of water containing 0.1% formic acid (FA) (Fisher Chemical, Thermo Fisher Scientific, Inc.). The proteomic analysis of the peptides was carried out on Q Exactive (Thermo Fisher Scientific, Inc.) equipped with

UltiMate 3000 Nano LC Systems (Thermo Fisher Scientific, Inc.). Peptide sample (2  $\mu$ L) was injected onto an Acclaim PepMap 1000 trap column (75  $\mu$ m  $\times$  2 cm, nanoViper C18 3  $\mu$ m, 100 $\text{\AA}$ , Thermo Fisher Scientific) which was heated to 40  $^{\circ}$ C in a chamber which was connected to a C18 reverse-phase Aurora UHPLC Emitter Column with nano Zero & Captive Spray Insert (75  $\mu$ m  $\times$  25 cm, Ion Opticks Pty Ltd) using Dreamspray interface (AMR INCORPORATED). Nano pump flow rate was set to 250 nL/min with 170 min gradient, where the mobile phases were A (0.1% FA in water, Fisher Chemical, Thermo Fisher Scientific, Inc.) and B (0.1% FA in acetonitrile, Fisher Chemical, Thermo Fisher Scientific, Inc.). The chromatography gradient was designed to provide a linear increase 0-8 min at 2% B, 8-15 min from 2% B to 15% B, 15-149 min from 15% B to 40% B, 149-150 min from 40% B to 95% B, wash, 8 min and 11 min equilibrium. The data-dependent acquisition was performed in positive ion mode. Mass spectrometer parameters were as follows: MS full scan from  $m/z$  350–1500 at a resolution of 70,000, AGC target  $3 \times e^6$ , maximum injection time 100 ms, and dd-MS<sup>2</sup>/dd-SIM parameters included AGC target:  $1 \times e^5$ , maximum injection time: 120 ms, TopN: 10, and isolation window 1.6  $m/z$ . dd settings were Minimum AGC of  $2.5 \times e^3$ , Charge exclusion unassigned, 1, 7, 8, >8, and Dynamic exclusion was set to 30 s.

All MS/MS samples were analyzed using Proteome Discoverer 2.2.0.388, which was set up to search UniProt-human.fasta (downloaded January 2019). Proteins were identified using the following parameters: Precursor mass tolerance: 10ppm, Fragment mass tolerance: 0.02 Da, Max missed cleavage sites: 2, Dynamic modification: Oxidation / + 15.995 Da (M), Dynamic modifications (protein terminus): N-Terminal Modification: Acetyl/ +42.011 Da (N-Terminus), Static Modification: Carbamidomethyl / +57.021 Da (C). Target FDR (Strict): 0.01, Target FDR (Relaxed): 0.05.

### Statistical analysis

For comparison between EVs that were CD9-immunoprecipitated with or without EDEG, proteins were identified in at least three runs and quantified with label-free quantification (LFQ) values using Proteome Discoverer. LFQ parameters were set to Normalization mode: Total peptide amount, Imputation mode: missing value: Low abundance resampling, Ratio calculation: Summed abundance based. Median of obtained normalized abundances of each identified protein, medians of proteins between two sample groups, log<sub>2</sub>, -log<sub>10</sub>, p-value, and fold change were calculated using Microsoft Excel and visualized by Volcano plots using R (version 3.5.3).

## Results

### Chelating reagent enhanced the efficiency of IP in serum, plasma, saliva, and urine samples using anti-CD9 antibody

We have compared the yields of immunocapture using the anti-CD9 antibody in matched set specimens. Western blot analysis showed that the CD9 signal of EDTA plasma was the strongest in comparison to serum and plasma containing other anticoagulants e.g., heparin, acid-citrate-dextrose, citrate phosphate dextrose, and sodium citrate (Fig.1 A). Based on the assumption that chelating reagent would enhance the efficiency of immunocapture using the anti-CD9 antibody, we performed immunoprecipitation of CD9 positive vesicles with EDEG reagent (50mM EDTA and 50mM EGTA in PBS). As we have expected, the yields of immunocaptured CD9 with EDEG reagent was improved compared with PBS dilution specimens (Fig.1 B). The yields of CD9 from urine or saliva were slightly improved (Fig.1 C). These differences might reflect the crudeness of specimens, that is, saliva and urine contained fewer contaminant proteins compared to serum and plasma(10).

### **The purity of immunocaptured CD9 positive vesicles was higher using EDEG reagent than immunocapture with PBS, ultracentrifugation method, and polymer-based precipitation**

We carried out a series of western blot analyses for serum EVs isolated by Ultracentrifugation (UC), Total Exosome Isolation Reagent (polymer-based precipitation), and immunoprecipitation with an anti-CD9 antibody in EDEG-treated or PBS-treated specimens (EDEG-CD9IP and PBS-CD9IP, respectively). EVs isolated with UC or polymer-based precipitation method were shown to contain both EV-associated proteins (CD9, CD63, and CD81) and non-EV marker proteins (HSA, HIGG, and ApoE) (Fig.2). These results suggest that the EVs isolated using these methods contain a substantial amount of contaminant proteins, which is in line with the previous report (3). On the other hand, EVs in EDEG-CD9IP showed a dramatic reduction in the amount of non-EV marker proteins compared with UC and polymer-based purification. In addition, the amount of EV-associated proteins detected in EDEG-CD9IP was greater than that in PBS-CD9IP. These results indicate that EDEG reagent enables the isolation of highly pure EVs with increased efficiency.

### **Proteomic profiling of CD9 immunoprecipitated EVs from serum diluted with PBS or EDEG reagent**

We have carried out proteomic analysis of CD9-immunoprecipitated EVs by LC-MS/MS. Proteomic analysis of EVs with and without EDEG reagent identified 159 proteins and 106 proteins, respectively. Here, EV markers such as CD9 and CD81 were identified only in EDEG diluted serum (Fig.3 A). LFQ analysis was performed to quantify each identified protein. Volcano plot analysis showed EVs immunoprecipitated without EDEG reagent (PBS) contained abundant complement proteins compared to those with EDEG reagent (Fig. 3B). Also, the EVs without EDEG reagent contained complement-related proteins such as properdin and complement C1r, and calcium-binding proteins (i.e. sorcin) (supplementary Table.1). These results suggested that EVs isolated by IP with the EDEG reagent give us access to more potential proteins for clinical diagnosis.

## **Discussion**

Although a large number of EV purification methods and kits are now available, it has been demonstrated that non-EV associated proteins and molecules are co-isolated as contaminants (3). In this report, we have shown that IP method using a chelating reagent increases the purity and the yield of CD9 positive vesicles from multiple body fluids, such as serum, plasma, urine, and saliva.

In addition, EVs are heterogeneous vesicles composed of apoptotic bodies, microvesicles, and exosomes(7). The ratio of EV subpopulations and the recovery rate of each subpopulation depends on isolation methods and conditions of biofluids, both of which account for the low repeatability of EV separation.

Accordingly, we have developed a method to improve yields and purity of EVs isolated from multiple specimens for clinical use. In this study, we employed an immunocapture method to isolate EVs with high specificity. As shown in Fig.1A, the amount of recovered CD9 positive EVs varies depending on the added anticoagulants, and chelating reagent improves the reliability of IP isolation of EVs from biofluids. These results may reflect the fact that matrix proteins in specimens are associated with EV surface proteins (8), and these proteins inhibit interactions between antibodies and their targeted membrane proteins on EVs for IP assays.

Quantitative proteomic analysis revealed that IP using EDEG reduced the amount of

calcium-dependent adhesion proteins including complement family proteins and immunoglobulin families (Supplementary Table.1). It has been reported that membrane adhesion proteins such as integrin, albumin, and cadherin family need metallic ions for interaction with proteins on the surface of the membrane (11). Since the EV marker protein CD9 is known to interact with integrin families ( $\alpha 6\beta 1$  and  $\alpha 5\beta 1$ ), fibronectin, and immunoglobulins (12), chelating reagent enables the dissociation of extracellular contaminant proteins and enhance the interaction between EVs surface CD9 and anti-CD9 antibody.

Furthermore, the quantitative proteomic analysis showed that the reduction of contaminant proteins increased the number of identified proteins, and EV marker proteins such as CD9 and CD81 were only identified in EDEG-based IP (Fig.3A). It indicates that extracellular matrix proteins abound in EVs fraction and they mask the proteins of interest when carrying out proteomics analyses. UC method is time-consuming and it includes substantial amount of contaminant proteins, while polymer method is rapid but additives or ingredients contained in EV isolation reagents sometimes adversely affect subsequent analyses, e.g., mass spectrometry. Our study showed that the EDEG chelating reagent is applicable to proteomic analysis as well as other omics analyses.

Taken together, our results show that chelating reagents are capable of efficiently recovering CD9 positive EVs from serum, plasma, and urine, which could contribute to clinical application of EVs and biomarker detection for diagnosis. EDEG combined with IP using an antibody against specific protein may even enable the isolation of certain EVs population, e.g., ones containing organ-specific membrane protein of clinical interest. It will also provide a reliable tool in clinical labs with automated systems.

## Acknowledgments

We acknowledge Ms. Haruka Shitara (PERSOL TEMPSTAFF CO., LTD.) for her technical support. We also thank Mr. Takuya Sakyu for the preparation of antibodies against CD9 and CD63.

## References

1. Caby MP, Lankar D, Vincendeau-Scherrer C, Raposo G, Bonnerot C. Exosomal-like vesicles are present in human blood plasma. *Int Immunol*. 2005;17(7):879–87.
2. Pisitkun T, Shen RF, Knepper MA. Identification and proteomic profiling of exosomes in human urine. *Proc Natl Acad Sci U S A*. 2004;101(36):13368–73.
3. Witwer KW, Buzás EI, Bemis LT, Bora A, Lässer C, Lötval J, et al. Standardization of sample collection, isolation and analysis methods in extracellular vesicle research. *J Extracell Vesicles*. 2013;2(1).
4. Becker A, Thakur BK, Weiss JM, Kim HS, Peinado H, Lyden D. Extracellular Vesicles in Cancer: Cell-to-Cell Mediators of Metastasis. *Cancer Cell*. 2016;30(6):836–48.
5. Valadi H, Ekström K, Bossios A, Sjöstrand M, Lee JJ, Lötval JO. Exosome-mediated transfer of mRNAs and microRNAs is a novel mechanism of genetic exchange between cells. *Nat Cell Biol*. 2007;9(6):654–9.
6. Maguire CA, Balaj L, Sivaraman S, Crommentuijn MHW, Ericsson M, Mincheva-Nilsson L, et al. Microvesicle-associated AAV vector as a novel gene delivery system. *Mol Ther [Internet]*. 2012;20(5):960–71. Available from: <http://dx.doi.org/10.1038/mt.2011.303>
7. Raposo G, Stoorvogel W. Extracellular vesicles: Exosomes, microvesicles, and friends. *J Cell Biol*. 2013;200(4):373–83.
8. Erozcenci LA, Böttger F, Bijnsdorp I V., Jimenez CR. Urinary exosomal proteins as

- (pan-)cancer biomarkers: insights from the proteome. *FEBS Lett.* 2019;593(13):1580–97.
- Ishigami A, Uchida Y, Miyazaki T, Handa S, Choi EK, Kim YS, et al. Two novel sandwich ELISAs identify PAD4 levels and PAD4 autoantibodies in patients with rheumatoid arthritis. *Mod Rheumatol.* 2013;23(4):794–803.
  - Barratt J, Topham P. Urine proteomics: The present and future of measuring urinary protein components in disease. *Cmaj.* 2007;177(4):361–8.
  - Besarab A, Deguzman A, Swanson JW. Effect of albumin and free calcium concentrations on calcium binding in vitro. *J Clin Pathol.* 1981;34(12):1361–7.
  - Cook GA, Longhurst CM, Grgurevich S, Cholera S, Crossno JT, Jennings LK. Identification of CD9 extracellular domains important in regulation of CHO cell adhesion to fibronectin and fibronectin pericellular matrix assembly. *Blood.* 2002;100(13):4502–11.

### Figure legends

Figure 1 Chelating reagent EDEG enhanced the recovery rate of CD9 positive EVs from serum, saliva, urine, and plasma.

(A) Immunoprecipitated CD9 positive EVs from matched set specimens, including serum and plasma containing different anticoagulants, heparin, acid-citrate-dextrose (ACD), citrate phosphate dextrose (CPD), sodium citrate (citrate), and EDTA were detected by anti-CD9 antibody.

(B) Western blotting analysis of immunoprecipitated CD9 positive EVs from matched specimen with or without EDEG were performed. (C) Saliva and urine with or without EDEG were subjected to western blot analysis by anti-CD9 antibody. Each specimen used for EV isolation was 300  $\mu$ L.

Figure 2 Western blot analysis of serum EVs isolated by CD9 immunoaffinity. PBS-CD9IP, EDEG-CD9IP, UC, and Polymer represent EVs isolated by IP method with CD9 antibody using PBS, using EDEG, ultracentrifugation method, and polymer-based precipitation, respectively. Abbreviations: HSA, Human serum albumin; HIGG, human immunoglobulin; ApoE, apolipoprotein E.

Figure 3 LC-MS analysis of immunocaptured EVs using anti-CD9 antibody from serum diluted with PBS or EDEG reagent. A. Venn diagram displaying proteins immunocaptured CD9 positive EVs from serum diluted with PBS or EDEG. B. Volcano plot analysis. Complement proteins and tetraspanins of interest are highlighted in red.

### Supplementary Table.1

List of proteins identified in volcano plot analysis.

### Author contributions

Conceptualization: Ayako Kurimoto, Tatsutoshi Inuzuka.

Data curation: Ayako Kurimoto,

Investigation: Tatsutoshi Inuzuka, Yuki Kawasaki, Ayako Kurimoto, Toshiki Ueda.

Methodology: Tatsutoshi Inuzuka, Yuki Kawasaki, Ayako Kurimoto

Visualization: Ayako Kurimoto

Writing – original draft: Ayako Kurimoto

Writing – review & editing: Ayako Kurimoto, Tatsutoshi Inuzuka, Yuki Kawasaki, Fumi Asai, Koichiro Murashima, Kazuya Omi.

AK and TI conceived the project and designed the research. TI, YK, TU, and AK performed the experiments for isolation and characterization of EVs. AK wrote the paper. All authors read and approved the final manuscript.



Fig.1

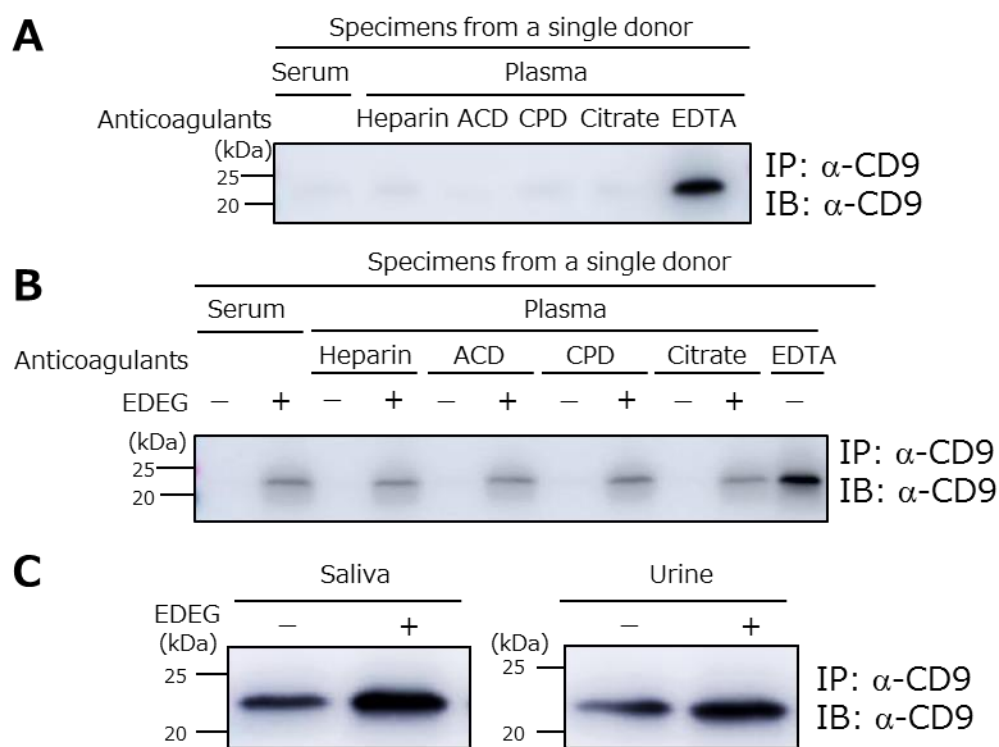

Fig.2

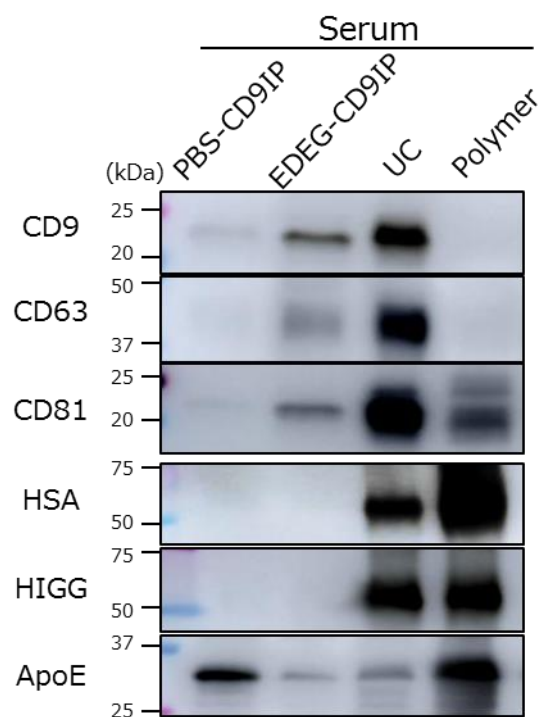

Fig.3

**A**

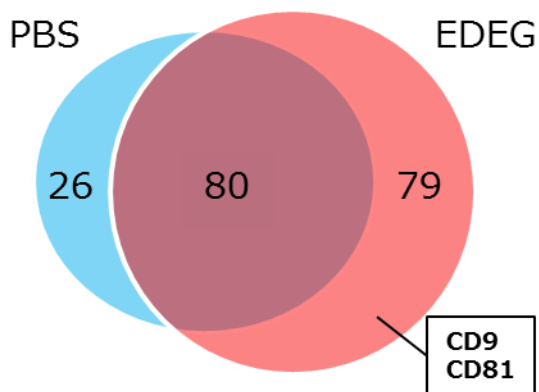

**B**

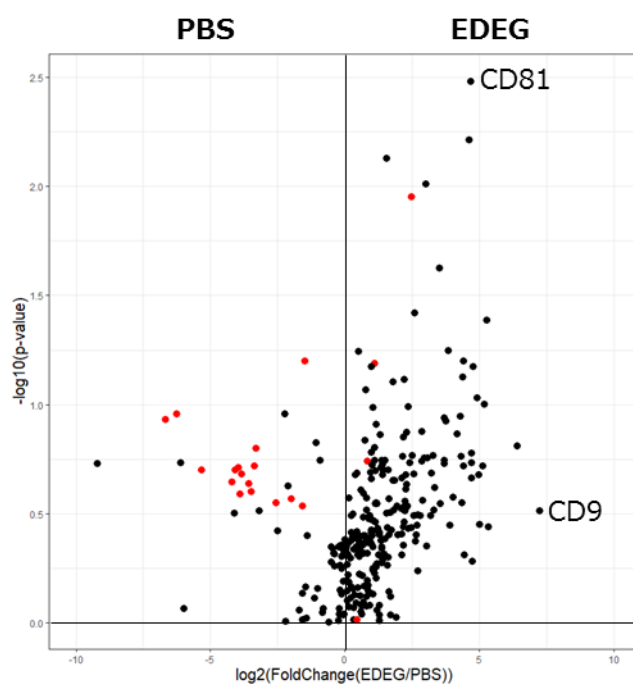

## Supplementary Table.1

| Accession  | Description                                                                                                  | Log2 Ratio | -Log10 Pvalue |
|------------|--------------------------------------------------------------------------------------------------------------|------------|---------------|
| P27918     | Properdin OS=Homo sapiens OX=9606 GN=CFP PE=1 SV=2                                                           | -9.21E+00  | 0.732022915   |
| P00736     | Complement C1r subcomponent OS=Homo sapiens OX=9606 GN=C1R PE=1 SV=2                                         | -6.67E+00  | 0.932703645   |
| P09871     | Complement C1s subcomponent OS=Homo sapiens OX=9606 GN=C1S PE=1 SV=1                                         | -6.27E+00  | 0.958798169   |
| P04003     | C4b-binding protein alpha chain OS=Homo sapiens OX=9606 GN=C4BPA PE=1 SV=2                                   | -6.12E+00  | 0.736169924   |
| P30626     | Sorcin OS=Homo sapiens OX=9606 GN=SRI PE=1 SV=1                                                              | -6.00E+00  | 0.066304008   |
| POC0L5     | Complement C4-B OS=Homo sapiens OX=9606 GN=C4B PE=1 SV=2                                                     | -5.33E+00  | 0.701717383   |
| P13671     | Complement component C6 OS=Homo sapiens OX=9606 GN=C6 PE=1 SV=3                                              | -4.20E+00  | 0.645828021   |
| P07225     | Vitamin K-dependent protein S OS=Homo sapiens OX=9606 GN=PROS1 PE=1 SV=1                                     | -4.12E+00  | 0.50545492    |
| P01024     | Complement C3 OS=Homo sapiens OX=9606 GN=C3 PE=1 SV=2                                                        | -4.09E+00  | 0.702957103   |
| P08603     | Complement factor H OS=Homo sapiens OX=9606 GN=CFH PE=1 SV=4                                                 | -3.96E+00  | 0.711196913   |
| P07360     | Complement component C8 gamma chain OS=Homo sapiens OX=9606 GN=C8G PE=1 SV=3                                 | -3.90E+00  | 0.590594893   |
| Q9BXR6     | Complement factor H-related protein 5 OS=Homo sapiens OX=9606 GN=CFHR5 PE=1 SV=1                             | -3.84E+00  | 0.682086128   |
| P01031     | Complement C5 OS=Homo sapiens OX=9606 GN=C5 PE=1 SV=4                                                        | -3.57E+00  | 0.641050121   |
| POC0L4     | Complement C4-A OS=Homo sapiens OX=9606 GN=C4A PE=1 SV=2                                                     | -3.50E+00  | 0.604352541   |
| P07357     | Complement component C8 alpha chain OS=Homo sapiens OX=9606 GN=C8A PE=1 SV=2                                 | -3.38E+00  | 0.719130797   |
| P06681     | Complement C2 OS=Homo sapiens OX=9606 GN=C2 PE=1 SV=2                                                        | -3.30E+00  | 0.802126212   |
| P20851     | C4b-binding protein beta chain OS=Homo sapiens OX=9606 GN=C4BPB PE=1 SV=1                                    | -3.20E+00  | 0.51566606    |
| B4E124     | cDNA FLJ55673, highly similar to Complement factor B OS=Homo sapiens OX=9606 PE=1 SV=1                       | -2.56E+00  | 0.552723029   |
| P05155     | Plasma protease C1 inhibitor OS=Homo sapiens OX=9606 GN=SERPING1 PE=1 SV=2                                   | -2.52E+00  | 0.422465227   |
| Q8N4Y2     | EF-hand calcium-binding domain-containing protein 4A OS=Homo sapiens OX=9606 GN=CRACR2B PE=1 SV=3            | -2.24E+00  | 0.959703387   |
| A0A0C4DH35 | Immunoglobulin heavy variable 3-35 (non-functional) (Fragment) OS=Homo sapiens OX=9606 GN=IGHV3-35 PE=1 SV=1 | -2.21E+00  | 0.00798       |
| A0A2R8Y3M9 | Uncharacterized protein OS=Homo sapiens OX=9606 PE=4 SV=1                                                    | -2.13E+00  | 0.628116708   |
| P07358     | Complement component C8 beta chain OS=Homo sapiens OX=9606 GN=C8B PE=1 SV=3                                  | -1.99E+00  | 0.570594253   |
| P01701     | Immunoglobulin lambda variable 1-51 OS=Homo sapiens OX=9606 GN=IGLV1-51 PE=1 SV=2                            | -1.70E+00  | 0.05916425    |
| A0A0B4J1Y8 | Immunoglobulin lambda variable 9-49 OS=Homo sapiens OX=9606 GN=IGLV9-49 PE=1 SV=1                            | -1.59E+00  | 0.014684573   |
| P23142     | Fibulin-1 OS=Homo sapiens OX=9606 GN=FBLN1 PE=1 SV=4                                                         | -1.57E+00  | 0.137267383   |
| P02748     | Complement component C9 OS=Homo sapiens OX=9606 GN=C9 PE=1 SV=2                                              | -1.57E+00  | 0.53668074    |
| P10643     | Complement component C7 OS=Homo sapiens OX=9606 GN=C7 PE=1 SV=2                                              | -1.50E+00  | 1.201645461   |
| P01602     | Immunoglobulin kappa variable 1-5 OS=Homo sapiens OX=9606 GN=IGKV1-5 PE=1 SV=2                               | -1.47E+00  | 0.166642098   |
| Q961Y4     | Carboxypeptidase B2 OS=Homo sapiens OX=9606 GN=CPB2 PE=1 SV=2                                                | -1.42E+00  | 0.02285973    |
| Q8WWA0     | Intelectin-1 OS=Homo sapiens OX=9606 GN=ITLN1 PE=1 SV=1                                                      | -1.41E+00  | 0.400892024   |
| Q16610     | Extracellular matrix protein 1 OS=Homo sapiens OX=9606 GN=ECPM1 PE=1 SV=2                                    | -1.15E+00  | 0.113122544   |
| Q9H4M9     | EH domain-containing protein 1 OS=Homo sapiens OX=9606 GN=EHD1 PE=1 SV=2                                     | -1.09E+00  | 0.827058267   |
| Q9Y251     | Heparanase OS=Homo sapiens OX=9606 GN=HPSE PE=1 SV=2                                                         | -1.01E+00  | 0.15999596    |
| Q6UXH0     | Angiotensin-like protein 8 OS=Homo sapiens OX=9606 GN=ANGPTL8 PE=1 SV=1                                      | -9.26E-01  | 0.7470323     |
| P02776     | Platelet factor 4 OS=Homo sapiens OX=9606 GN=PF4 PE=1 SV=2                                                   | -8.29E-01  | 0.049963814   |
| P02751     | Fibronectin OS=Homo sapiens OX=9606 GN=FN1 PE=1 SV=4                                                         | -8.15E-01  | 0.067937752   |
| A0A0C4DH69 | Immunoglobulin kappa variable 1-9 OS=Homo sapiens OX=9606 GN=IGKV1-9 PE=3 SV=1                               | -6.11E-01  | 0.00420412    |
| P02654     | Apolipoprotein C-I OS=Homo sapiens OX=9606 GN=APOC1 PE=1 SV=1                                                | -5.15E-01  | 0.348040007   |
| O75915     | PRA1 family protein 3 OS=Homo sapiens OX=9606 GN=ARL6IP5 PE=1 SV=1                                           | -5.04E-01  | 0.280049575   |
| P68371     | Tubulin beta-4B chain OS=Homo sapiens OX=9606 GN=TUBB4B PE=1 SV=1                                            | -4.36E-01  | 0.342736137   |
| Q93084     | Sarcoplasmic/endoplasmic reticulum calcium ATPase 3 OS=Homo sapiens OX=9606 GN=ATP2A3 PE=1 SV=2              | -4.16E-01  | 0.319053436   |
| P01860     | Immunoglobulin heavy constant gamma 3 OS=Homo sapiens OX=9606 GN=IGHG3 PE=1 SV=2                             | -4.00E-01  | 0.261859785   |
| A0A0J9Y99  | Uncharacterized protein (Fragment) OS=Homo sapiens OX=9606 PE=1 SV=1                                         | -3.93E-01  | 0.315021209   |
| P03952     | Plasma kallikrein OS=Homo sapiens OX=9606 GN=KLKB1 PE=1 SV=1                                                 | -2.45E-01  | 0.010823604   |
| P25705     | ATP synthase subunit alpha, mitochondrial OS=Homo sapiens OX=9606 GN=ATP5F1A PE=1 SV=1                       | -2.41E-01  | 0.348834496   |
| P06732     | Creatine kinase M-type OS=Homo sapiens OX=9606 GN=CKM PE=1 SV=2                                              | -2.24E-01  | 0.039870339   |
| P08519     | Apolipoprotein(a) OS=Homo sapiens OX=9606 GN=LPA PE=1 SV=1                                                   | -2.23E-01  | 0.065477187   |
| Q9HC84     | Mucin-5B OS=Homo sapiens OX=9606 GN=MUC5B PE=1 SV=3                                                          | -1.80E-01  | 0.153130918   |
| P51148     | Ras-related protein Rab-5C OS=Homo sapiens OX=9606 GN=RAB5C PE=1 SV=2                                        | -1.68E-01  | 0.265744495   |
| Q9NQC3     | Reticulon-4 OS=Homo sapiens OX=9606 GN=RTN4 PE=1 SV=2                                                        | -1.58E-01  | 0.355278863   |
| P61026     | Ras-related protein Rab-10 OS=Homo sapiens OX=9606 GN=RAB10 PE=1 SV=1                                        | -1.29E-01  | 0.30668235    |
| Q71U36     | Tubulin alpha-1A chain OS=Homo sapiens OX=9606 GN=TUBA1A PE=1 SV=1                                           | -1.25E-01  | 0.355947417   |
| P35030     | Trypsin-3 OS=Homo sapiens OX=9606 GN=PRSS3 PE=1 SV=2                                                         | -1.22E-01  | 0.13414886    |
| Q99829     | Copine-1 OS=Homo sapiens OX=9606 GN=CPNE1 PE=1 SV=1                                                          | -1.18E-01  | 0.250353965   |
| P01703     | Immunoglobulin lambda variable 1-40 OS=Homo sapiens OX=9606 GN=IGLV1-40 PE=1 SV=2                            | -7.55E-02  | 0.193278561   |
| P48426     | Phosphatidylinositol 5-phosphate 4-kinase type-2 alpha OS=Homo sapiens OX=9606 GN=PIP4K2A PE=1 SV=2          | -5.88E-02  | 0.33608603    |
| O14787     | Transportin-2 OS=Homo sapiens OX=9606 GN=TNPO2 PE=1 SV=3                                                     | -5.54E-02  | 0.037911024   |
| P48740     | Mannan-binding lectin serine protease 1 OS=Homo sapiens OX=9606 GN=MASP1 PE=1 SV=3                           | -5.21E-02  | 0.316418091   |
| P00747     | Plasminogen OS=Homo sapiens OX=9606 GN=PLG PE=1 SV=2                                                         | -3.29E-02  | 0.04221068    |
| P02787     | Serotransferrin OS=Homo sapiens OX=9606 GN=TF PE=1 SV=3                                                      | -1.19E-02  | 0.383400825   |

| Accession  | Description                                                                                                         | Log2 Ratio | -Log10 Pvalue |
|------------|---------------------------------------------------------------------------------------------------------------------|------------|---------------|
| P04275     | von Willebrand factor OS=Homo sapiens OX=9606 GN=VWF PE=1 SV=4                                                      | 5.88E-02   | 0.348791815   |
| P02766     | Transthyretin OS=Homo sapiens OX=9606 GN=TTR PE=1 SV=1                                                              | 5.93E-02   | 0.196454504   |
| P61158     | Actin-related protein 3 OS=Homo sapiens OX=9606 GN=ACTR3 PE=1 SV=3                                                  | 6.93E-02   | 0.323351268   |
| A0A0A0MRZ8 | Immunoglobulin kappa variable 3D-11 OS=Homo sapiens OX=9606 GN=IGKV3D-11 PE=3 SV=6                                  | 7.73E-02   | 0.307939121   |
| P69905     | Hemoglobin subunit alpha OS=Homo sapiens OX=9606 GN=HBA1 PE=1 SV=2                                                  | 8.50E-02   | 0.147784901   |
| P04114     | Apolipoprotein B-100 OS=Homo sapiens OX=9606 GN=APOB PE=1 SV=2                                                      | 9.09E-02   | 0.103008407   |
| P19823     | Inter-alpha-trypsin inhibitor heavy chain H2 OS=Homo sapiens OX=9606 GN=ITIH2 PE=1 SV=2                             | 9.75E-02   | 0.267318015   |
| Q9NTJ5     | Phosphatidylinositol phosphatase SAC1 OS=Homo sapiens OX=9606 GN=SACM1L PE=1 SV=2                                   | 1.03E-01   | 0.1878762     |
| P01011     | Alpha-1-antichymotrypsin OS=Homo sapiens OX=9606 GN=SERPINA3 PE=1 SV=2                                              | 1.12E-01   | 0.219837346   |
| P01700     | Immunoglobulin lambda variable 1-47 OS=Homo sapiens OX=9606 GN=IGLV1-47 PE=1 SV=2                                   | 1.26E-01   | 0.368834522   |
| Q13790     | Apolipoprotein F OS=Homo sapiens OX=9606 GN=APOF PE=1 SV=2                                                          | 1.29E-01   | 0.313723345   |
| P08319     | Alcohol dehydrogenase 4 OS=Homo sapiens OX=9606 GN=ADH4 PE=1 SV=5                                                   | 1.34E-01   | 0.18989947    |
| P01709     | Immunoglobulin lambda variable 2-8 OS=Homo sapiens OX=9606 GN=IGLV2-8 PE=1 SV=2                                     | 1.38E-01   | 0.372456184   |
| P01743     | Immunoglobulin heavy variable 1-46 OS=Homo sapiens OX=9606 GN=IGHV1-46 PE=1 SV=2                                    | 1.57E-01   | 0.075058586   |
| P02649     | Apolipoprotein E OS=Homo sapiens OX=9606 GN=APOE PE=1 SV=1                                                          | 1.58E-01   | 0.573947181   |
| Q9P129     | Coiled-coil domain-containing protein 180 OS=Homo sapiens OX=9606 GN=CCDC180 PE=2 SV=3                              | 2.03E-01   | 0.113890218   |
| Q14141     | Septin-6 OS=Homo sapiens OX=9606 GN=SEPT6 PE=1 SV=4                                                                 | 2.16E-01   | 0.299053235   |
| A0A0A0MS15 | Immunoglobulin heavy variable 3-49 OS=Homo sapiens OX=9606 GN=IGHV3-49 PE=3 SV=1                                    | 2.32E-01   | 0.166589487   |
| P19652     | Alpha-1-acid glycoprotein 2 OS=Homo sapiens OX=9606 GN=ORM2 PE=1 SV=2                                               | 2.33E-01   | 0.417343336   |
| P15153     | Ras-related C3 botulinum toxin substrate 2 OS=Homo sapiens OX=9606 GN=RAC2 PE=1 SV=1                                | 2.34E-01   | 0.380713027   |
| A0A096LPE2 | SAA2-SAA4 readthrough OS=Homo sapiens OX=9606 GN=SAA2-SAA4 PE=4 SV=1                                                | 2.36E-01   | 0.493858432   |
| P68366     | Tubulin alpha-4A chain OS=Homo sapiens OX=9606 GN=TUBAA4 PE=1 SV=1                                                  | 2.51E-01   | 0.388593909   |
| P00450     | Ceruloplasmin OS=Homo sapiens OX=9606 GN=CP PE=1 SV=1                                                               | 3.03E-01   | 0.500317117   |
| Q06033     | Inter-alpha-trypsin inhibitor heavy chain H3 OS=Homo sapiens OX=9606 GN=ITIH3 PE=1 SV=2                             | 3.04E-01   | 0.160757905   |
| P20340     | Ras-related protein Rab-6A OS=Homo sapiens OX=9606 GN=RAB6A PE=1 SV=3                                               | 3.27E-01   | 0.339965087   |
| P01782     | Immunoglobulin heavy variable 3-9 OS=Homo sapiens OX=9606 GN=IGHV3-9 PE=1 SV=2                                      | 3.29E-01   | 0.07264338    |
| Q8WU48     | Tsukushin OS=Homo sapiens OX=9606 GN=TSKU PE=2 SV=3                                                                 | 3.32E-01   | 0.01463832    |
| A0A075B6K4 | Immunoglobulin lambda variable 3-10 OS=Homo sapiens OX=9606 GN=IGLV3-10 PE=3 SV=2                                   | 3.52E-01   | 0.13001641    |
| P02768     | Serum albumin OS=Homo sapiens OX=9606 GN=ALB PE=1 SV=2                                                              | 3.82E-01   | 0.678114607   |
| Q9Y277     | Voltage-dependent anion-selective channel protein 3 OS=Homo sapiens OX=9606 GN=VDAC3 PE=1 SV=1                      | 3.92E-01   | 0.412709926   |
| P35527     | Keratin, type I cytoskeletal 9 OS=Homo sapiens OX=9606 GN=KRT9 PE=1 SV=3                                            | 3.99E-01   | 0.34980943    |
| P12259     | Coagulation factor V OS=Homo sapiens OX=9606 GN=F5 PE=1 SV=4                                                        | 4.07E-01   | 0.094021819   |
| P01824     | Immunoglobulin heavy variable 4-39 OS=Homo sapiens OX=9606 GN=IGHV4-39 PE=1 SV=2                                    | 4.43E-01   | 0.418424153   |
| P36980     | Complement factor H-related protein 2 OS=Homo sapiens OX=9606 GN=CFHR2 PE=1 SV=1                                    | 4.46E-01   | 0.01712067    |
| P55209     | Nucleosome assembly protein 1-like 1 OS=Homo sapiens OX=9606 GN=NAP1L1 PE=1 SV=1                                    | 4.55E-01   | 0.40280576    |
| P13646     | Keratin, type I cytoskeletal 13 OS=Homo sapiens OX=9606 GN=KRT13 PE=1 SV=4                                          | 4.57E-01   | 0.688957995   |
| P07477     | Trypsin-1 OS=Homo sapiens OX=9606 GN=PRSS1 PE=1 SV=1                                                                | 4.61E-01   | 0.161887604   |
| P02774     | Vitamin D-binding protein OS=Homo sapiens OX=9606 GN=GC PE=1 SV=2                                                   | 4.78E-01   | 0.405490358   |
| B9A064     | Immunoglobulin lambda-like polypeptide 5 OS=Homo sapiens OX=9606 GN=IGLL5 PE=2 SV=2                                 | 4.80E-01   | 0.311743345   |
| P05090     | Apolipoprotein D OS=Homo sapiens OX=9606 GN=APOD PE=1 SV=1                                                          | 4.94E-01   | 0.1246121451  |
| Q9C0H2     | Protein tweety homolog 3 OS=Homo sapiens OX=9606 GN=TTYH3 PE=1 SV=3                                                 | 5.14E-01   | 0.38099969    |
| P00738     | Haptoglobin OS=Homo sapiens OX=9606 GN=HP PE=1 SV=1                                                                 | 5.22E-01   | 0.303984798   |
| P55058     | Phospholipid transfer protein OS=Homo sapiens OX=9606 GN=PLTP PE=1 SV=1                                             | 5.35E-01   | 0.374877886   |
| Q00391     | Sulphydryl oxidase 1 OS=Homo sapiens OX=9606 GN=SOX1 PE=1 SV=3                                                      | 5.43E-01   | 0.223394396   |
| P01857     | Immunoglobulin heavy constant gamma 1 OS=Homo sapiens OX=9606 GN=IGHG1 PE=1 SV=1                                    | 5.50E-01   | 0.124243038   |
| A0A0U1RRH7 | Histone H2A OS=Homo sapiens OX=9606 PE=3 SV=1                                                                       | 5.71E-01   | 0.336193279   |
| Q9UBV8     | Peflin OS=Homo sapiens OX=9606 GN=PEF1 PE=1 SV=1                                                                    | 5.86E-01   | 0.087304802   |
| P06312     | Immunoglobulin kappa variable 4-1 OS=Homo sapiens OX=9606 GN=IGKV4-1 PE=1 SV=1                                      | 5.91E-01   | 0.05269245    |
| P02790     | Hemopexin OS=Homo sapiens OX=9606 GN=HPX PE=1 SV=2                                                                  | 6.05E-01   | 0.610684724   |
| P02656     | Apolipoprotein C-III OS=Homo sapiens OX=9606 GN=APOC3 PE=1 SV=1                                                     | 6.08E-01   | 0.0787766     |
| A0A075B7D0 | Immunoglobulin heavy variable 1/OR15-1 (non-functional) [Fragment] OS=Homo sapiens OX=9606 GN=IGHV1OR15-1 PE=1 SV=1 | 6.37E-01   | 0.041992049   |
| P00488     | Coagulation factor XIII A chain OS=Homo sapiens OX=9606 GN=F13A1 PE=1 SV=4                                          | 6.51E-01   | 0.356359047   |
| P02763     | Alpha-1-acid glycoprotein 1 OS=Homo sapiens OX=9606 GN=ORM1 PE=1 SV=1                                               | 6.55E-01   | 0.361439579   |
| P02679     | Fibrinogen gamma chain OS=Homo sapiens OX=9606 GN=FGG PE=1 SV=3                                                     | 6.57E-01   | 0.217862997   |
| P07384     | Calpain-1 catalytic subunit OS=Homo sapiens OX=9606 GN=CAPN1 PE=1 SV=1                                              | 6.70E-01   | 0.594538723   |
| Q00299     | Chloride intracellular channel protein 1 OS=Homo sapiens OX=9606 GN=CLIC1 PE=1 SV=4                                 | 6.81E-01   | 0.400944884   |
| P11142     | Heat shock cognate 71 kDa protein OS=Homo sapiens OX=9606 GN=HSPA8 PE=1 SV=1                                        | 6.84E-01   | 0.484300133   |
| P02671     | Fibrinogen alpha chain OS=Homo sapiens OX=9606 GN=FGA PE=1 SV=2                                                     | 6.96E-01   | 0.095256409   |
| P23083     | Immunoglobulin heavy variable 1-2 OS=Homo sapiens OX=9606 GN=IGHV1-2 PE=1 SV=2                                      | 7.13E-01   | 0.168375197   |
| P12429     | Annexin A3 OS=Homo sapiens OX=9606 GN=ANXA3 PE=1 SV=3                                                               | 7.20E-01   | 0.319517789   |
| P09972     | Fructose-bisphosphate aldolase C OS=Homo sapiens OX=9606 GN=ALDOC PE=1 SV=2                                         | 7.27E-01   | 0.400708539   |
| P01009     | Alpha-1-antitrypsin OS=Homo sapiens OX=9606 GN=SERPINA1 PE=1 SV=3                                                   | 7.33E-01   | 0.838712625   |
| O75083     | WD repeat-containing protein 1 OS=Homo sapiens OX=9606 GN=WDR1 PE=1 SV=4                                            | 7.62E-01   | 0.389503844   |
| P10909     | Clusterin OS=Homo sapiens OX=9606 GN=CLU PE=1 SV=1                                                                  | 7.66E-01   | 1.06756596    |
| O60814     | Histone H2B type 1-K OS=Homo sapiens OX=9606 GN=HIST1H2BK PE=1 SV=3                                                 | 7.74E-01   | 0.368557306   |
| P06702     | Protein S100-A9 OS=Homo sapiens OX=9606 GN=S100A9 PE=1 SV=1                                                         | 7.96E-01   | 0.123238064   |
| P22352     | Glutathione peroxidase 3 OS=Homo sapiens OX=9606 GN=GPX3 PE=1 SV=2                                                  | 8.08E-01   | 0.57343368    |
| A0A1B0GTC6 | Uncharacterized protein C3orf85 OS=Homo sapiens OX=9606 GN=C3orf85 PE=3 SV=1                                        | 8.09E-01   | 0.079920304   |
| Q8TDL5     | BPI fold-containing family B member 1 OS=Homo sapiens OX=9606 GN=BPIFB1 PE=1 SV=1                                   | 8.11E-01   | 0.516638234   |
| P02746     | Complement C1q subcomponent subunit B OS=Homo sapiens OX=9606 GN=C1QB PE=1 SV=3                                     | 8.29E-01   | 0.743244149   |
| P02675     | Fibrinogen beta chain OS=Homo sapiens OX=9606 GN=FBG PE=1 SV=2                                                      | 8.34E-01   | 0.195935414   |
| P02652     | Apolipoprotein A-II OS=Homo sapiens OX=9606 GN=APOA2 PE=1 SV=1                                                      | 8.38E-01   | 0.321925905   |
| P21333     | Filamin-A OS=Homo sapiens OX=9606 GN=FLNA PE=1 SV=4                                                                 | 8.47E-01   | 0.173786138   |
| A0A0B4J2D9 | Immunoglobulin kappa variable 1D-13 OS=Homo sapiens OX=9606 GN=IGKV1D-13 PE=3 SV=1                                  | 8.64E-01   | 0.146461291   |
| P05106     | Integrin beta-3 OS=Homo sapiens OX=9606 GN=ITGB3 PE=1 SV=2                                                          | 8.82E-01   | 0.47986135    |
| Q9H3U1     | Protein unc-45 homolog A OS=Homo sapiens OX=9606 GN=UNC45A PE=1 SV=1                                                | 8.89E-01   | 0.374106181   |
| Q8IWA5     | Choline transporter-like protein 2 OS=Homo sapiens OX=9606 GN=SLC4A2 PE=1 SV=3                                      | 8.95E-01   | 0.36912325    |
| P04792     | Heat shock protein beta-1 OS=Homo sapiens OX=9606 GN=HSPB1 PE=1 SV=2                                                | 9.08E-01   | 0.491654414   |
| P24844     | Myosin regulatory light polypeptide 9 OS=Homo sapiens OX=9606 GN=MYL9 PE=1 SV=4                                     | 9.09E-01   | 0.382828144   |
| P01817     | Immunoglobulin heavy variable 2-5 OS=Homo sapiens OX=9606 GN=IGHV2-5 PE=1 SV=2                                      | 9.21E-01   | 0.37239784    |
| F5H423     | Uncharacterized protein OS=Homo sapiens OX=9606 PE=3 SV=1                                                           | 9.25E-01   | 0.389293578   |
| Q04771     | Activin receptor type-1 OS=Homo sapiens OX=9606 GN=ACVR1 PE=1 SV=1                                                  | 9.26E-01   | 0.378025773   |
| P04430     | Immunoglobulin kappa variable 1-16 OS=Homo sapiens OX=9606 GN=IGKV1-16 PE=1 SV=2                                    | 9.34E-01   | 0.380172367   |
| P68871     | Hemoglobin subunit beta OS=Homo sapiens OX=9606 GN=HBB PE=1 SV=2                                                    | 9.34E-01   | 0.083278562   |
| O08697     | Alpha-2-antiplasmin OS=Homo sapiens OX=9606 GN=SERPINF2 PE=1 SV=3                                                   | 9.61E-01   | 0.692634659   |
| P07911     | Uromodulin OS=Homo sapiens OX=9606 GN=UMOD PE=1 SV=1                                                                | 9.67E-01   | 0.365936489   |
| Q9H487     | Tubulin beta-1 chain OS=Homo sapiens OX=9606 GN=TUBB1 PE=1 SV=1                                                     | 9.67E-01   | 0.426890221   |
| P61769     | Beta-2-microglobulin OS=Homo sapiens OX=9606 GN=B2M PE=1 SV=1                                                       | 9.79E-01   | 0.144421024   |

|            |                                                                                                            |          |             |
|------------|------------------------------------------------------------------------------------------------------------|----------|-------------|
| Q08380     | Galectin-3-binding protein OS=Homo sapiens OX=9606 GN=LGALS3BP PE=1 SV=1                                   | 9.82E-01 | 0.6607924   |
| P48059     | LIM and senescent cell antigen-like-containing domain protein 1 OS=Homo sapiens OX=9606 GN=LIMS1 PE=1 SV=4 | 9.87E-01 | 1.174749508 |
| P30041     | Pireoxiredoxin-6 OS=Homo sapiens OX=9606 GN=PRDX6 PE=1 SV=3                                                | 9.89E-01 | 0.781281616 |
| P02760     | Protein AMBP OS=Homo sapiens OX=9606 GN=AMBP PE=1 SV=1                                                     | 9.91E-01 | 0.136668614 |
| P13645     | Keratin, type I cytoskeletal 10 OS=Homo sapiens OX=9606 GN=KRT10 PE=1 SV=6                                 | 1.00E+00 | 0.419183873 |
| P11597     | Cholesteryl ester transfer protein OS=Homo sapiens OX=9606 GN=CETP PE=1 SV=2                               | 1.01E+00 | 0.399620449 |
| P02749     | Beta-2-glycoprotein 1 OS=Homo sapiens OX=9606 GN=APOH PE=1 SV=3                                            | 1.01E+00 | 0.722385828 |
| P06727     | Apolipoprotein A-IV OS=Homo sapiens OX=9606 GN=APOA4 PE=1 SV=3                                             | 1.03E+00 | 0.173169744 |
| O75340     | Programmed cell death protein 6 OS=Homo sapiens OX=9606 GN=PCDC6 PE=1 SV=1                                 | 1.03E+00 | 0.350029289 |
| POCF74     | Immunoglobulin lambda constant 6 OS=Homo sapiens OX=9606 GN=IGLC6 PE=1 SV=1                                | 1.03E+00 | 0.24489747  |
| P35579     | Myosin-9 OS=Homo sapiens OX=9606 GN=MYH9 PE=1 SV=4                                                         | 1.04E+00 | 0.471620926 |
| P04004     | Vitronectin OS=Homo sapiens OX=9606 GN=VTN PE=1 SV=1                                                       | 1.04E+00 | 0.986828903 |
| O95445     | Apolipoprotein M OS=Homo sapiens OX=9606 GN=APOM PE=1 SV=2                                                 | 1.05E+00 | 0.251100095 |
| P04899     | Guanine nucleotide-binding protein G(i) subunit alpha-2 OS=Homo sapiens OX=9606 GN=GNAI2 PE=1 SV=3         | 1.08E+00 | 0.423772089 |
| P02747     | Complement C1q subcomponent subunit C OS=Homo sapiens OX=9606 GN=C1QC PE=1 SV=3                            | 1.09E+00 | 1.189303679 |
| P60953     | Cell division control protein 42 homolog OS=Homo sapiens OX=9606 GN=CDC42 PE=1 SV=2                        | 1.10E+00 | 0.804881366 |
| K7ER74     | APOC4-APOC2 readthrough (NMD candidate) OS=Homo sapiens OX=9606 GN=APOC4-APOC2 PE=1 SV=1                   | 1.10E+00 | 0.229184598 |
| P23528     | Cofilin-1 OS=Homo sapiens OX=9606 GN=CFL1 PE=1 SV=3                                                        | 1.11E+00 | 0.747469635 |
| P60709     | Actin, cytoplasmic 1 OS=Homo sapiens OX=9606 GN=ACTB PE=1 SV=1                                             | 1.12E+00 | 0.464957052 |
| P55056     | Apolipoprotein C-IV OS=Homo sapiens OX=9606 GN=APOC4 PE=1 SV=1                                             | 1.14E+00 | 0.262994256 |
| P02647     | Apolipoprotein A-I OS=Homo sapiens OX=9606 GN=APOA1 PE=1 SV=1                                              | 1.14E+00 | 0.69653247  |
| P01023     | Alpha-2-macroglobulin OS=Homo sapiens OX=9606 GN=A2M PE=1 SV=3                                             | 1.14E+00 | 0.548774908 |
| P34931     | Heat shock 70 kDa protein 1-like OS=Homo sapiens OX=9606 GN=HSPA1L PE=1 SV=2                               | 1.15E+00 | 0.910671974 |
| O43866     | CD5 antigen-like OS=Homo sapiens OX=9606 GN=CD5L PE=1 SV=1                                                 | 1.16E+00 | 0.206937143 |
| P08133     | Annexin A6 OS=Homo sapiens OX=9606 GN=ANXA6 PE=1 SV=3                                                      | 1.16E+00 | 0.550072984 |
| P01871     | Immunoglobulin heavy constant mu OS=Homo sapiens OX=9606 GN=IGHM PE=1 SV=4                                 | 1.17E+00 | 0.257113883 |
| P00338     | L-lactate dehydrogenase A chain OS=Homo sapiens OX=9606 GN=LDHA PE=1 SV=2                                  | 1.18E+00 | 0.547256721 |
| Q9UHG3     | Prenylcysteine oxidase 1 OS=Homo sapiens OX=9606 GN=PCYOX1 PE=1 SV=3                                       | 1.20E+00 | 0.272129129 |
| Q9P2E9     | Ribosome-binding protein 1 OS=Homo sapiens OX=9606 GN=RRBP1 PE=1 SV=5                                      | 1.20E+00 | 0.059138873 |
| P01042     | Kinogen-1 OS=Homo sapiens OX=9606 GN=KNG1 PE=1 SV=2                                                        | 1.23E+00 | 0.433301114 |
| P09525     | Annexin A4 OS=Homo sapiens OX=9606 GN=ANXA4 PE=1 SV=4                                                      | 1.24E+00 | 0.313538481 |
| P01780     | Immunoglobulin heavy variable 3-7 OS=Homo sapiens OX=9606 GN=IGHV3-7 PE=1 SV=2                             | 1.27E+00 | 0.415154041 |
| P01593     | Immunoglobulin kappa variable 1D-33 OS=Homo sapiens OX=9606 GN=IGKV1D-33 PE=1 SV=2                         | 1.27E+00 | 0.037738077 |
| O00194     | Ras-related protein Rab-27B OS=Homo sapiens OX=9606 GN=RAB27B PE=1 SV=4                                    | 1.28E+00 | 0.404917715 |
| P62805     | Histone H4 OS=Homo sapiens OX=9606 GN=HIST1H4A PE=1 SV=2                                                   | 1.29E+00 | 0.080138918 |
| S4R460     | Immunoglobulin heavy variable 3/OR16-9 (non-functional) OS=Homo sapiens OX=9606 GN=IGHV3OR16-9 PE=1 SV=2   | 1.29E+00 | 0.011437451 |
| P00734     | Prothrombin OS=Homo sapiens OX=9606 GN=F2 PE=1 SV=2                                                        | 1.32E+00 | 0.862640142 |
| AAOAC4DH43 | Immunoglobulin heavy variable 2-70D OS=Homo sapiens OX=9606 GN=IGHV2-70D PE=3 SV=1                         | 1.34E+00 | 0.378075535 |
| P01008     | Antithrombin-III OS=Homo sapiens OX=9606 GN=SERPINC1 PE=1 SV=1                                             | 1.34E+00 | 0.712451556 |
| Q9Y210     | Short transient receptor potential channel 6 OS=Homo sapiens OX=9606 GN=TRPC6 PE=1 SV=1                    | 1.36E+00 | 0.343122432 |
| O95810     | Caveolae-associated protein 2 OS=Homo sapiens OX=9606 GN=CAVIN2 PE=1 SV=3                                  | 1.37E+00 | 0.351502311 |
| P01704     | Immunoglobulin lambda variable 2-14 OS=Homo sapiens OX=9606 GN=IGLV2-14 PE=1 SV=2                          | 1.37E+00 | 0.745079552 |
| P28676     | Grancalcin OS=Homo sapiens OX=9606 GN=GCA PE=1 SV=2                                                        | 1.38E+00 | 0.278029461 |
| P16284     | Platelet endothelial cell adhesion molecule OS=Homo sapiens OX=9606 GN=PECAM1 PE=1 SV=2                    | 1.39E+00 | 0.6802527   |
| Q6Q788     | Apolipoprotein A-V OS=Homo sapiens OX=9606 GN=APOA5 PE=1 SV=1                                              | 1.39E+00 | 0.720210102 |
| P01591     | Immunoglobulin J chain OS=Homo sapiens OX=9606 GN=JCHAIN PE=1 SV=4                                         | 1.40E+00 | 0.288691333 |
| P01019     | Angiotensinogen OS=Homo sapiens OX=9606 GN=AGT PE=1 SV=1                                                   | 1.41E+00 | 0.706067153 |
| P06733     | Alpha-enolase OS=Homo sapiens OX=9606 GN=ENO1 PE=1 SV=2                                                    | 1.41E+00 | 0.299423638 |
| Q15485     | Ficolin-2 OS=Homo sapiens OX=9606 GN=FCN2 PE=1 SV=2                                                        | 1.44E+00 | 0.296232885 |
| AAO087WW87 | Immunoglobulin kappa variable 2-40 OS=Homo sapiens OX=9606 GN=IGKV2-40 PE=3 SV=2                           | 1.45E+00 | 0.31838071  |
| P00739     | Haptoglobin-related protein OS=Homo sapiens OX=9606 GN=HPR PE=2 SV=2                                       | 1.49E+00 | 0.744053633 |
| AAO075B6H7 | Immunoglobulin kappa variable 3-7 (non-functional) (Fragment) OS=Homo sapiens OX=9606 GN=IGKV3-7 PE=1 SV=1 | 1.49E+00 | 0.385967577 |
| Q9BXN1     | Asporin OS=Homo sapiens OX=9606 GN=ASPN PE=1 SV=2                                                          | 1.54E+00 | 1.219773143 |
| P15311     | Ezrin OS=Homo sapiens OX=9606 GN=EZR PE=1 SV=4                                                             | 1.55E+00 | 0.502695696 |
| P20073     | Annexin A7 OS=Homo sapiens OX=9606 GN=ANXA7 PE=1 SV=3                                                      | 1.58E+00 | 0.264334651 |
| AAOAC4DH38 | Immunoglobulin heavy variable 5-51 OS=Homo sapiens OX=9606 GN=IGHV5-51 PE=3 SV=1                           | 1.59E+00 | 0.437648502 |
| P01619     | Immunoglobulin kappa variable 3-20 OS=Homo sapiens OX=9606 GN=IGKV3-20 PE=1 SV=2                           | 1.62E+00 | 0.701428794 |
| P01859     | Immunoglobulin heavy constant gamma 2 OS=Homo sapiens OX=9606 GN=IGHG2 PE=1 SV=2                           | 1.62E+00 | 0.301539727 |
| AAOAC4DH72 | Immunoglobulin kappa variable 1-6 OS=Homo sapiens OX=9606 GN=IGKV1-6 PE=3 SV=1                             | 1.63E+00 | 0.568650152 |
| P01876     | Immunoglobulin heavy constant alpha 1 OS=Homo sapiens OX=9606 GN=IGHA1 PE=1 SV=2                           | 1.65E+00 | 0.406552526 |
| P28039     | Acyloxyacyl hydrolase OS=Homo sapiens OX=9606 GN=AOAH PE=1 SV=1                                            | 1.65E+00 | 0.143645721 |
| P00558     | Phosphoglycerate kinase 1 OS=Homo sapiens OX=9606 GN=PGK1 PE=1 SV=3                                        | 1.69E+00 | 0.038560384 |
| P35908     | Keratin, type II cytoskeletal 2 epidermal OS=Homo sapiens OX=9606 GN=KRT2 PE=1 SV=2                        | 1.71E+00 | 0.509175908 |
| P01834     | Immunoglobulin kappa constant OS=Homo sapiens OX=9606 GN=IGKC PE=1 SV=2                                    | 1.71E+00 | 0.123026497 |
| O14950     | Myosin regulatory light chain 12B OS=Homo sapiens OX=9606 GN=MYL12B PE=1 SV=2                              | 1.73E+00 | 0.38433916  |
| P12931     | Proto-oncogene tyrosine-protein kinase Src OS=Homo sapiens OX=9606 GN=SRC PE=1 SV=3                        | 1.78E+00 | 1.105165113 |
| O14791     | Apolipoprotein L1 OS=Homo sapiens OX=9606 GN=APOL1 PE=1 SV=5                                               | 1.79E+00 | 0.654978306 |
| P43304     | Glycerol-3-phosphate dehydrogenase, mitochondrial OS=Homo sapiens OX=9606 GN=GPD2 PE=1 SV=3                | 1.80E+00 | 0.517304542 |
| P13598     | Intercellular adhesion molecule 2 OS=Homo sapiens OX=9606 GN=ICAM2 PE=1 SV=2                               | 1.83E+00 | 0.655981535 |
| AAO09YX35  | Immunoglobulin heavy variable 3-64D OS=Homo sapiens OX=9606 GN=IGHV3-64D PE=3 SV=1                         | 1.89E+00 | 0.026757005 |
| Q01518     | Adenylyl cyclase-associated protein 1 OS=Homo sapiens OX=9606 GN=CAP1 PE=1 SV=5                            | 1.93E+00 | 0.53513779  |
| P50995     | Annexin A11 OS=Homo sapiens OX=9606 GN=ANXA11 PE=1 SV=1                                                    | 1.95E+00 | 0.405416257 |
| P62979     | Ubiquitin-40S ribosomal protein S27a OS=Homo sapiens OX=9606 GN=RPS27A PE=1 SV=2                           | 2.09E+00 | 0.526883504 |
| P08758     | Annexin A5 OS=Homo sapiens OX=9606 GN=ANXA5 PE=1 SV=2                                                      | 2.11E+00 | 0.409123639 |
| AAO075B6Q5 | Immunoglobulin heavy variable 3-64 OS=Homo sapiens OX=9606 GN=IGHV3-64 PE=3 SV=1                           | 2.12E+00 | 0.312871229 |
| P04264     | Keratin, type II cytoskeletal 1 OS=Homo sapiens OX=9606 GN=KRT1 PE=1 SV=6                                  | 2.12E+00 | 0.665466929 |
| P04406     | Glycerol-3-phosphate dehydrogenase OS=Homo sapiens OX=9606 GN=GAPDH PE=1 SV=3                              | 2.15E+00 | 0.763380793 |
| O75131     | Copine-3 OS=Homo sapiens OX=9606 GN=CPNE3 PE=1 SV=1                                                        | 2.17E+00 | 0.441430348 |
| O14672     | Disintegrin and metalloproteinase domain-containing protein 10 OS=Homo sapiens OX=9606 GN=ADAM10 PE=1 SV=1 | 2.17E+00 | 0.358563926 |
| Q31612     | HLA class I histocompatibility antigen, B-73 alpha chain OS=Homo sapiens OX=9606 GN=HLA-B PE=1 SV=1        | 2.18E+00 | 0.853828502 |
| P80108     | Phosphatidylinositol-glycan-specific phospholipase D OS=Homo sapiens OX=9606 GN=GPLD1 PE=1 SV=3            | 2.19E+00 | 0.534435615 |
| Q9NR31     | GTP-binding protein SAR1a OS=Homo sapiens OX=9606 GN=SAR1A PE=1 SV=1                                       | 2.20E+00 | 0.51678583  |
| P12814     | Alpha-actinin-1 OS=Homo sapiens OX=9606 GN=ACTN1 PE=1 SV=2                                                 | 2.21E+00 | 0.464403778 |
| Q13418     | Integrin-linked protein kinase OS=Homo sapiens OX=9606 GN=ILK PE=1 SV=2                                    | 2.21E+00 | 1.114687748 |
| P47756     | F-actin-capping protein subunit beta OS=Homo sapiens OX=9606 GN=CAPZB PE=1 SV=4                            | 2.23E+00 | 0.514881382 |
| Q9Y490     | Talin-1 OS=Homo sapiens OX=9606 GN=TLN1 PE=1 SV=3                                                          | 2.24E+00 | 0.559138282 |
| P06396     | Gelsolin OS=Homo sapiens OX=9606 GN=GSN PE=1 SV=1                                                          | 2.25E+00 | 0.530033356 |
| PODP02     | Immunoglobulin heavy variable 3-30-3 OS=Homo sapiens OX=9606 GN=IGHV3-30-3 PE=3 SV=1                       | 2.26E+00 | 0.679429238 |
| P61160     | Actin-related protein 2 OS=Homo sapiens OX=9606 GN=ACTR2 PE=1 SV=1                                         | 2.27E+00 | 0.615639626 |

|            |                                                                                                                       |          |             |
|------------|-----------------------------------------------------------------------------------------------------------------------|----------|-------------|
| P51149     | Ras-related protein Rab-7a OS=Homo sapiens OX=9606 GN=RAB7A PE=1 SV=1                                                 | 2.28E+00 | 0.873401382 |
| P08567     | Pleckstrin OS=Homo sapiens OX=9606 GN=PLEK PE=1 SV=3                                                                  | 2.29E+00 | 0.635389335 |
| P14618     | Pyruvate kinase PKM OS=Homo sapiens OX=9606 GN=PKM PE=1 SV=4                                                          | 2.29E+00 | 0.53390118  |
| P37802     | Transgelin-2 OS=Homo sapiens OX=9606 GN=TAGLN2 PE=1 SV=3                                                              | 2.31E+00 | 0.535294743 |
| P01877     | Immunoglobulin heavy constant alpha 2 OS=Homo sapiens OX=9606 GN=IGHA2 PE=1 SV=4                                      | 2.34E+00 | 0.432809214 |
| P19827     | Inter-alpha-trypsin inhibitor heavy chain H1 OS=Homo sapiens OX=9606 GN=ITH1 PE=1 SV=3                                | 2.36E+00 | 0.992170994 |
| P02743     | Serum amyloid P-component OS=Homo sapiens OX=9606 GN=APCS PE=1 SV=2                                                   | 2.42E+00 | 0.735933194 |
| P13647     | Keratin, type II cytoskeletal 5 OS=Homo sapiens OX=9606 GN=KRT5 PE=1 SV=3                                             | 2.47E+00 | 0.436609313 |
| P02745     | Complement C1q subcomponent subunit A OS=Homo sapiens OX=9606 GN=C1QA PE=1 SV=2                                       | 2.48E+00 | 1.951448407 |
| P08571     | Monocyte differentiation antigen CD14 OS=Homo sapiens OX=9606 GN=CD14 PE=1 SV=2                                       | 2.51E+00 | 0.769293691 |
| P27701     | CD82 antigen OS=Homo sapiens OX=9606 GN=CD82 PE=1 SV=1                                                                | 2.56E+00 | 0.448870766 |
| P62873     | Guanine nucleotide-binding protein G(i)/G(s)/G(t) subunit beta-1 OS=Homo sapiens OX=9606 GN=GNB1 PE=1 SV=3            | 2.57E+00 | 0.682530119 |
| P10114     | Ras-related protein Rap-2a OS=Homo sapiens OX=9606 GN=RAP2A PE=1 SV=1                                                 | 2.60E+00 | 1.421701331 |
| P18428     | Lipopolysaccharide-binding protein OS=Homo sapiens OX=9606 GN=LBP PE=1 SV=3                                           | 2.62E+00 | 0.374808189 |
| Q8WVW5     | Choline transporter-like protein 1 OS=Homo sapiens OX=9606 GN=SLC44A1 PE=1 SV=1                                       | 2.64E+00 | 0.404110843 |
| P07996     | Thrombospondin-1 OS=Homo sapiens OX=9606 GN=THBS1 PE=1 SV=2                                                           | 2.67E+00 | 0.448870766 |
| P01861     | Immunoglobulin heavy constant gamma 4 OS=Homo sapiens OX=9606 GN=IGHG4 PE=1 SV=1                                      | 2.71E+00 | 0.238474113 |
| P18206     | Vinculin OS=Homo sapiens OX=9606 GN=VCL PE=1 SV=4                                                                     | 2.72E+00 | 0.496092381 |
| P04075     | Fructose-bisphosphate aldolase A OS=Homo sapiens OX=9606 GN=ALDOA PE=1 SV=2                                           | 2.79E+00 | 0.49304897  |
| P13224     | Platelet glycoprotein Ib beta chain OS=Homo sapiens OX=9606 GN=GP1BB PE=1 SV=1                                        | 2.86E+00 | 0.878211167 |
| P01833     | Polymeric immunoglobulin receptor OS=Homo sapiens OX=9606 GN=PIGR PE=1 SV=4                                           | 2.87E+00 | 0.743485138 |
| Q9HBI1     | Beta-parvin OS=Homo sapiens OX=9606 GN=PARVB PE=1 SV=1                                                                | 2.89E+00 | 0.563525142 |
| P05546     | Heparin cofactor 2 OS=Homo sapiens OX=9606 GN=SERPIND1 PE=1 SV=3                                                      | 2.96E+00 | 0.756724119 |
| P62937     | Peptidyl-prolyl cis-trans isomerase A OS=Homo sapiens OX=9606 GN=PPIA PE=1 SV=2                                       | 3.00E+00 | 2.010982207 |
| Q8NG11     | Tetraspanin-14 OS=Homo sapiens OX=9606 GN=TSPAN14 PE=1 SV=1                                                           | 3.04E+00 | 0.353311491 |
| P63104     | 14-3-3 protein zeta/delta OS=Homo sapiens OX=9606 GN=YWHAZ PE=1 SV=1                                                  | 3.08E+00 | 0.781252226 |
| O00501     | Claudin-5 OS=Homo sapiens OX=9606 GN=CLDN5 PE=2 SV=1                                                                  | 3.18E+00 | 0.494005709 |
| P67936     | Tropomyosin alpha-4 chain OS=Homo sapiens OX=9606 GN=TPM4 PE=1 SV=3                                                   | 3.21E+00 | 0.687740383 |
| P23229     | Integrin alpha-6 OS=Homo sapiens OX=9606 GN=ITGA6 PE=1 SV=5                                                           | 3.27E+00 | 0.766723146 |
| P60660     | Myosin light polypeptide 6 OS=Homo sapiens OX=9606 GN=MYL6 PE=1 SV=2                                                  | 3.29E+00 | 0.517286157 |
| P29992     | Guanine nucleotide-binding protein subunit alpha-11 OS=Homo sapiens OX=9606 GN=GNA11 PE=1 SV=2                        | 3.32E+00 | 0.622948241 |
| P27169     | Serum paraoxonase/arylesterase 1 OS=Homo sapiens OX=9606 GN=PON1 PE=1 SV=3                                            | 3.52E+00 | 1.626537414 |
| O75954     | Tetraspanin-9 OS=Homo sapiens OX=9606 GN=TSPAN9 PE=1 SV=1                                                             | 3.54E+00 | 0.548778203 |
| O00560     | Syntenin-1 OS=Homo sapiens OX=9606 GN=SDCBP PE=1 SV=1                                                                 | 3.70E+00 | 0.732101061 |
| Q15404     | Ras suppressor protein 1 OS=Homo sapiens OX=9606 GN=RSU1 PE=1 SV=3                                                    | 3.70E+00 | 0.94030846  |
| P07737     | Profilin-1 OS=Homo sapiens OX=9606 GN=PFN1 PE=1 SV=2                                                                  | 3.70E+00 | 0.746589315 |
| P05556     | Integrin beta-1 OS=Homo sapiens OX=9606 GN=ITGB1 PE=1 SV=2                                                            | 3.74E+00 | 0.925079212 |
| P07900     | Heat shock protein HSP 90-alpha OS=Homo sapiens OX=9606 GN=HSP90AA1 PE=1 SV=5                                         | 3.85E+00 | 1.249920841 |
| Q8N699     | Myc target protein 1 OS=Homo sapiens OX=9606 GN=MYCT1 PE=1 SV=1                                                       | 3.89E+00 | 0.448147657 |
| P01721     | Immunoglobulin lambda variable 6-57 OS=Homo sapiens OX=9606 GN=IGLV6-57 PE=1 SV=2                                     | 4.03E+00 | 0.578331422 |
| P62820     | Ras-related protein Rab-1A OS=Homo sapiens OX=9606 GN=RAB1A PE=1 SV=3                                                 | 4.17E+00 | 0.866219377 |
| P01891     | HLA class I histocompatibility antigen, A-68 alpha chain OS=Homo sapiens OX=9606 GN=HLA-A PE=1 SV=4                   | 4.28E+00 | 0.947627644 |
| P02765     | Alpha-2-HS-glycoprotein OS=Homo sapiens OX=9606 GN=AHS2 PE=1 SV=2                                                     | 4.32E+00 | 0.76288846  |
| Q14624     | Inter-alpha-trypsin inhibitor heavy chain H4 OS=Homo sapiens OX=9606 GN=ITH4 PE=1 SV=4                                | 4.35E+00 | 0.549963775 |
| P61224     | Ras-related protein Rap-1b OS=Homo sapiens OX=9606 GN=RAP1B PE=1 SV=1                                                 | 4.39E+00 | 1.127007157 |
| P63000     | Ras-related C3 botulinum toxin substrate 1 OS=Homo sapiens OX=9606 GN=RAC1 PE=1 SV=1                                  | 4.40E+00 | 1.201202214 |
| P01893     | Putative HLA class I histocompatibility antigen, alpha chain H OS=Homo sapiens OX=9606 GN=HLA-H PE=5 SV=3             | 4.40E+00 | 0.719110965 |
| P53801     | Pituitary tumor-transforming gene 1 protein-interacting protein OS=Homo sapiens OX=9606 GN=PTTG1IP PE=1 SV=1          | 4.45E+00 | 0.312547647 |
| Q9Y624     | Junctional adhesion molecule A OS=Homo sapiens OX=9606 GN=F11R PE=1 SV=1                                              | 4.61E+00 | 2.213381992 |
| P60033     | CD81 antigen OS=Homo sapiens OX=9606 GN=CD81 PE=1 SV=1                                                                | 4.68E+00 | 2.482436129 |
| P11169     | Solute carrier family 2, facilitated glucose transporter member 3 OS=Homo sapiens OX=9606 GN=SLC2A3 PE=1 SV=1         | 4.70E+00 | 0.778908576 |
| P55083     | Microfibril-associated glycoprotein 4 OS=Homo sapiens OX=9606 GN=MFAP4 PE=1 SV=2                                      | 4.72E+00 | 0.734394639 |
| P14770     | Platelet glycoprotein IX OS=Homo sapiens OX=9606 GN=GP9 PE=1 SV=3                                                     | 4.72E+00 | 0.664627063 |
| AA0AB4J1V0 | Immunoglobulin heavy variable 3-15 OS=Homo sapiens OX=9606 GN=IGHV3-15 PE=3 SV=1                                      | 4.74E+00 | 0.283161543 |
| P08514     | Integrin alpha-Iib OS=Homo sapiens OX=9606 GN=ITGA2B PE=1 SV=3                                                        | 4.77E+00 | 1.174897104 |
| Q86UX7     | Fermitin family homolog 3 OS=Homo sapiens OX=9606 GN=FERMT3 PE=1 SV=1                                                 | 4.92E+00 | 1.031727479 |
| P16671     | Platelet glycoprotein 4 OS=Homo sapiens OX=9606 GN=CD36 PE=1 SV=2                                                     | 4.96E+00 | 0.678010559 |
| P62736     | Actin, aortic smooth muscle OS=Homo sapiens OX=9606 GN=ACTA2 PE=1 SV=1                                                | 5.01E+00 | 1.652723403 |
| P07359     | Platelet glycoprotein Ib alpha chain OS=Homo sapiens OX=9606 GN=GP1BA PE=1 SV=2                                       | 5.12E+00 | 0.720287173 |
| Q13103     | Secreted phosphoprotein 24 OS=Homo sapiens OX=9606 GN=SPP2 PE=1 SV=1                                                  | 5.17E+00 | 1.00144857  |
| Q08722     | Leukocyte surface antigen CD47 OS=Homo sapiens OX=9606 GN=CD47 PE=1 SV=1                                              | 5.27E+00 | 1.386630692 |
| P27105     | Erythrocyte band 7 integral membrane protein OS=Homo sapiens OX=9606 GN=STOM PE=1 SV=3                                | 5.32E+00 | 0.442537231 |
| AA0A75B7B8 | Immunoglobulin heavy variable 3/OR16-12 (non-functional) (Fragment) OS=Homo sapiens OX=9606 GN=IGHV3OR16-12 PE=1 SV=1 | 6.40E+00 | 0.812079004 |
| P21926     | CD9 antigen OS=Homo sapiens OX=9606 GN=CD9 PE=1 SV=4                                                                  | 7.23E+00 | 0.514149099 |
